# Supplementary material for: Strategies for fast ion transport in electrochemical capacitor electrolytes from diffusion coefficients, ionic conductivity, viscosity, density and interaction energies based on HSAB theory
Source: Royal Society of Chemistry journal article supplement (doi:10.1039/c7ra00455a), 2017-01-01
Supplement: c7ra00455a1.pdf [file c7ra00455a1.pdf]

## [Supporting Information]

# Strategies for Fast Ion Transport in Electrochemical Capacitor Electrolytes from Diffusion Coefficients, Ionic Conductivity, Viscosity, Density and Interaction Energies Based on HSAB Theory

Morihiro Saito,<sup>\*,a</sup> Satoru Kawaharasaki,<sup>a</sup> Kensuke Ito,<sup>a</sup> Shinya Yamada,<sup>a</sup> Kikuko Hayamizu<sup>b</sup> and Shiro Seki<sup>c</sup>

<sup>a</sup> *Department of Applied Chemistry, Faculty of Engineering, Tokyo University of Agriculture & Technology, 2-24-16 Naka-cho, Koganei-shi, Tokyo 184-8588, Japan*  
*E-mail: mosaito@cc.tuat.ac.jp; Tel/Fax: +81-42-388-7095*

<sup>b</sup> *Institute of Applied Physics, University of Tsukuba, 1-1-1 Tennoudai, Tsukuba, Ibaraki 305-8573, Japan*

<sup>c</sup> *Materials Science Research Laboratory, Central Research Institute of Electric Power Industry (CRIEPI), 2-6-1 Nagasaka, Yokosuka-shi, Kanagawa 240-0196, Japan*

**Table S1.** Self-diffusion coefficients  $D$  of ions and PC solvent and transference number of cations  $t_{\text{cation}}$  at each measured temperature

| Electrolyte                      |       | Self-diffusion coefficient / $10^{-10} \text{ m}^2 \text{ s}^{-1}$ |                     |                    | Transference     |
|----------------------------------|-------|--------------------------------------------------------------------|---------------------|--------------------|------------------|
|                                  |       | $D_{\text{PC}}$                                                    | $D_{\text{cation}}$ | $D_{\text{anion}}$ | number of cation |
| 1.0 M<br>TEABF <sub>4</sub> /PC  | 353 K | 9.2                                                                | 6.5                 | 9.5                | 0.41             |
|                                  | 333 K | 6.5                                                                | 4.4                 | 6.7                | 0.40             |
|                                  | 303 K | 3.7                                                                | 2.5                 | 3.5                | 0.42             |
|                                  | 283 K | 1.7                                                                | 1.1                 | 1.6                | 0.41             |
|                                  | 253 K | 0.79                                                               | 0.61                | 0.73               | 0.46             |
| 1.0 M<br>TEAPF <sub>6</sub> /PC  | 353 K | 10                                                                 | 7.3                 | 11.5               | 0.39             |
|                                  | 333 K | 6.8                                                                | 4.5                 | 6.2                | 0.42             |
|                                  | 303 K | 3.4                                                                | 2.2                 | 2.7                | 0.45             |
|                                  | 273 K | 1.6                                                                | 0.97                | 1.2                | 0.45             |
|                                  | 253 K | 0.73                                                               | 0.45                | 0.52               | 0.46             |
| 1.0 M<br>TEATfO/PC               | 353 K | 12                                                                 | 7.6                 | 10.5               | 0.42             |
|                                  | 303 K | 3.3                                                                | 2.2                 | 2.7                | 0.45             |
|                                  | 273 K | 1.6                                                                | 1.1                 | 1.2                | 0.47             |
|                                  | 253 K | 0.75                                                               | 0.48                | 0.57               | 0.46             |
| 1.0 M<br>TEMABF <sub>4</sub> /PC | 353 K | 19                                                                 | 13                  | 15                 | 0.46             |
|                                  | 333 K | 9.6                                                                | 6.9                 | 8.6                | 0.45             |
|                                  | 303 K | 3.9                                                                | 2.6                 | 3.5                | 0.43             |
|                                  | 273 K | 1.7                                                                | 1.1                 | 1.6                | 0.41             |
|                                  | 253 K | 0.87                                                               | 0.55                | 0.78               | 0.41             |
| 1.0 M<br>LiBF <sub>4</sub> /PC   | 353 K | 7.8                                                                | 4.4                 | 5.3                | 0.45             |
|                                  | 333 K | 4.8                                                                | 2.4                 | 3.0                | 0.44             |
|                                  | 303 K | 2.4                                                                | 1.0                 | 1.4                | 0.42             |
|                                  | 273 K | 0.97                                                               | 0.37                | 0.58               | 0.41             |
|                                  | 253 K | 0.39                                                               | 0.15                | 0.23               | 0.39             |

**Table S2.** Viscosity  $\eta$  for 1.0 M PC-based electrolytes at each measured temperature

| Electrolyte                      |       | Viscosity<br>$\eta$ / mPas | Inverse of viscosity<br>$\eta^{-1}$ / mPas <sup>-1</sup> |
|----------------------------------|-------|----------------------------|----------------------------------------------------------|
| 1.0 M<br>TEABF <sub>4</sub> /PC  | 353 K | 1.7                        | 0.60                                                     |
|                                  | 333 K | 2.2                        | 0.46                                                     |
|                                  | 303 K | 3.6                        | 0.27                                                     |
|                                  | 283 K | 5.9                        | 0.17                                                     |
| 1.0 M<br>TEAPF <sub>6</sub> /PC  | 353 K | 1.8                        | 0.56                                                     |
|                                  | 333 K | 2.3                        | 0.43                                                     |
|                                  | 303 K | 4.0                        | 0.25                                                     |
|                                  | 283 K | 6.7                        | 0.15                                                     |
| 1.0 M<br>TEATfO/PC               | 353 K | 1.7                        | 0.58                                                     |
|                                  | 333 K | 2.2 <sub>5</sub>           | 0.44                                                     |
|                                  | 303 K | 3.8                        | 0.26                                                     |
|                                  | 283 K | 6.2                        | 0.16                                                     |
| 1.0 M<br>TEMABF <sub>4</sub> /PC | 353 K | 1.6                        | 0.61                                                     |
|                                  | 333 K | 2.1                        | 0.47                                                     |
|                                  | 303 K | 3.6                        | 0.28                                                     |
|                                  | 283 K | 5.7                        | 0.17                                                     |
| 1.0 M<br>LiBF <sub>4</sub> /PC   | 353 K | 2.4                        | 0.42                                                     |
|                                  | 333 K | 3.2                        | 0.31                                                     |
|                                  | 303 K | 6.0                        | 0.17                                                     |
|                                  | 283 K | 11                         | 0.093                                                    |
